# Supplementary material for: A Study of Food Safety Knowledge for Sustainable Foodservice Management of Childcare Centers in South Korea Using Importance–Performance Analysis
Source: MDPI journal article supplement (doi:10.3390/ijerph19159668), 2022-08-05
Supplement: s1 [file s1]

**Supplementary Table S1.** General characteristics of respondents & childcare centers in Chungju (n = 150).

| Characteristics   |                              |                   | Frequency<br>(N) | Percent<br>(%) |
|-------------------|------------------------------|-------------------|------------------|----------------|
| Respondents       | Age                          | <40s              | 50               | 33.4           |
|                   |                              | 50s               | 64               | 42.7           |
|                   |                              | ≥60               | 35               | 23.3           |
|                   | Working duration (yrs)       | <5                | 78               | 52.3           |
|                   |                              | 5-10              | 46               | 30.9           |
|                   |                              | >10               | 25               | 16.8           |
|                   | Certificate                  | Yes               | 143              | 95.3           |
|                   |                              | No                | 7                | 4.7            |
|                   | Daily number of food serving | Breakfast         | 13               | 8.7            |
|                   |                              | Mid morning snack | 124              | 82.7           |
|                   |                              | Lunch             | 133              | 88.7           |
|                   |                              | Afternoon snack   | 122              | 81.3           |
|                   |                              | Dinner            | 22               | 14.7           |
|                   | Daily working hours (h)      | <4                | 29               | 19.3           |
|                   |                              | 4-8               | 112              | 74.7           |
|                   |                              | >8                | 8                | 5.3            |
| Childcare centers | Types of childcare centers   | National/public   | 23               | 15.3           |
|                   |                              | Private           | 73               | 48.7           |
|                   |                              | Home type         | 27               | 18.0           |
|                   |                              | Others            | 22               | 14.7           |
|                   | Number of enrolled children  | <50               | 101              | 69.2           |
|                   |                              | ≥50               | 45               | 30.8           |

1

2

3

4
